# Supplementary material for: Iron in airway macrophages and infective exacerbations of chronic obstructive pulmonary disease
Source: PubMed Central journal article supplement (PMC8756761; doi:10.1186/s12931-022-01929-7), 2022-01-12
Supplement: 12931_2022_1929_MOESM6_ESM.pdf [file 12931_2022_1929_MOESM6_ESM.pdf]

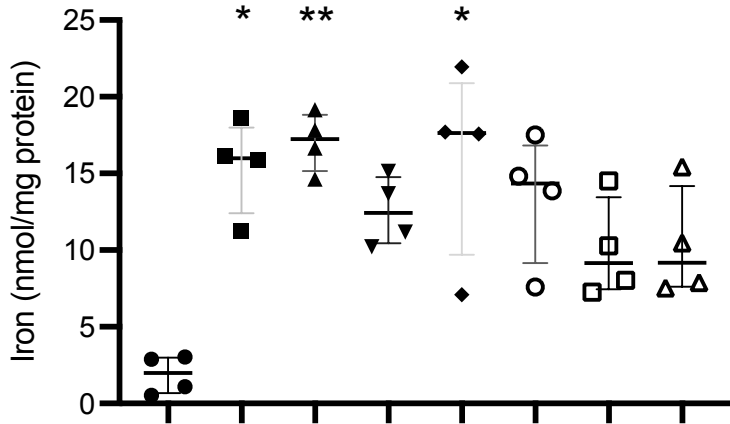

|                         |   |   |   |   |   |   |   |
|-------------------------|---|---|---|---|---|---|---|
| FeSO <sub>4</sub> 100μM | + | + | + | + | + | + | + |
| IL-6 50ng/mL            | - | + | - | - | + | + | + |
| Hepcidin 1μg/mL         | - | - | + | - | + | - | + |
| hi-Haemophilus          | - | - | - | + | - | + | + |
