# Supplementary material for: Iron in airway macrophages and infective exacerbations of chronic obstructive pulmonary disease
Source: PubMed Central journal article supplement (PMC8756761; doi:10.1186/s12931-022-01929-7), 2022-01-12

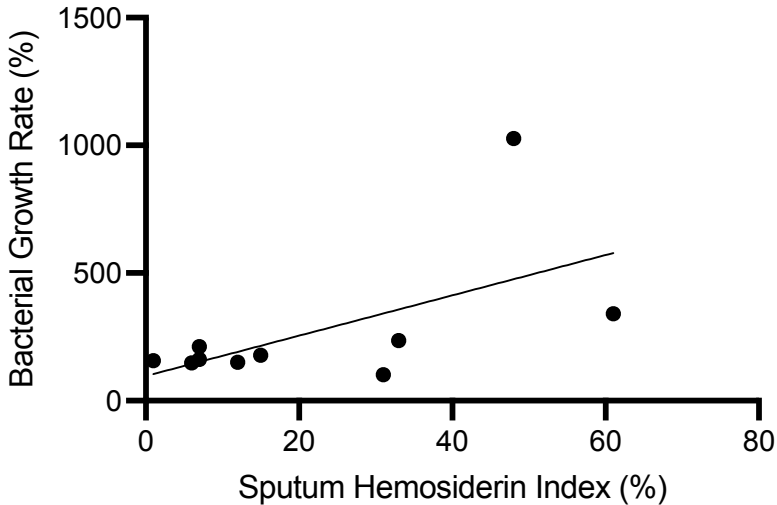

Supplement: 12931_2022_1929_MOESM7_ESM.pdf [file 12931_2022_1929_MOESM7_ESM.pdf]
